# Supplementary material for: A new method for the preparation of high-purity CO2-absorbing Li3NaSiO4 powder using lithium silicate and sodium carbonate
Source: Royal Society of Chemistry journal article supplement (doi:10.1039/d2dt02803d), 2022-01-01
Supplement: d2dt02803d1.pdf [file d2dt02803d1.pdf]

## Electronic supplementary information (ESI)

### **A new method for the preparation of high-purity CO<sub>2</sub>-absorbing Li<sub>3</sub>NaSiO<sub>4</sub> powder using lithium silicate and sodium carbonate**

Shumpei Iwasaki,<sup>a</sup> Kosuke Shido<sup>a</sup> and Takuya Hashimoto<sup>a\*</sup>

<sup>a</sup> Department of Physics, College of Humanities and Sciences, Nihon University, 3-25-40 Sakurajousui, Setagaya-ku, Tokyo 156-8550, Japan

#### **Preparation of Li<sub>2</sub>SiO<sub>3</sub>**

Nominal amounts of Li<sub>2</sub>CO<sub>3</sub> powder (99.9 %, Furuuchi Chemical Co.) and SiO<sub>2</sub> powder (99.9%, Kojundo Chemical Laboratory Co., Ltd) were mixed in ethanol using an Al<sub>2</sub>O<sub>3</sub> mortar and pestle. The mixed powder was heated at 950 °C for 24 h in air, followed by pulverization in the Al<sub>2</sub>O<sub>3</sub> mortar and pestle. The obtained powder was subsequently heated at 1000 °C for 24 h in air two times.

Fig. S1 shows the XRD pattern of the obtained powder. All the peaks were successfully indexed to orthorhombic symmetry with  $a = 5.398 \text{ \AA}$ ,  $b = 9.387 \text{ \AA}$ , and  $c = 4.661 \text{ \AA}$ , which confirmed the synthesis of single-phase Li<sub>2</sub>SiO<sub>3</sub> (JCPDS No. 29-0829).

---

\* Corresponding author: Department of Physics, College of Humanities and Sciences, Nihon University, 3-25-40 Sakurajousui, Setagaya-ku, Tokyo 156-8550, Japan  
E-mail address: hashimoto.takuya@nihon-u.ac.jp (Takuya Hashimoto)

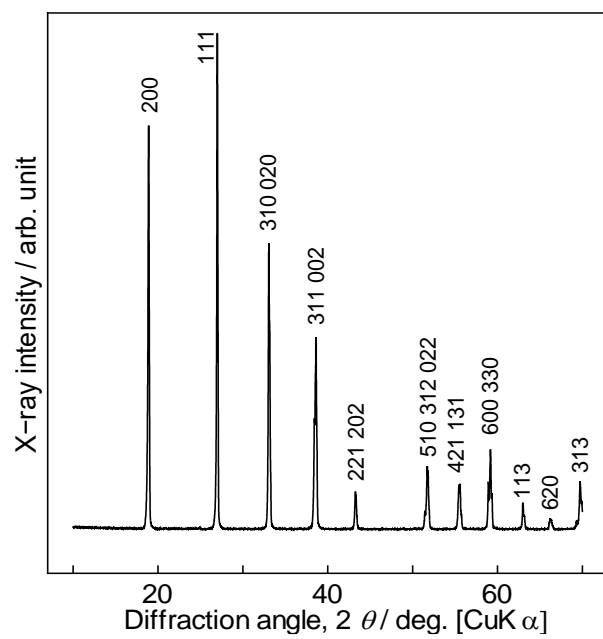

**Fig. S1** XRD pattern of the  $\text{Li}_2\text{SiO}_3$  compound employed in this study.

### Preparation of Li<sub>4</sub>SiO<sub>4</sub>

Nominal amounts of Li<sub>2</sub>CO<sub>3</sub> powder (99.9 %, Furuuchi Chemical Co.) and SiO<sub>2</sub> powder (99.9%, Furuuchi Chemical Co.) were mixed in ethanol using the Al<sub>2</sub>O<sub>3</sub> mortar and pestle. The mixed powder was heated at 700 °C for 12 h in air.

Fig. S2 shows the XRD pattern of the obtained powder. All the peaks were successfully indexed to monoclinic symmetry with  $a = 5.298 \text{ \AA}$ ,  $b = 6.102 \text{ \AA}$ ,  $c = 5.150 \text{ \AA}$ , and  $\beta = 90.25^\circ$ , which validated the synthesis of single-phase Li<sub>4</sub>SiO<sub>4</sub> (JCPDS No. 37-1472).

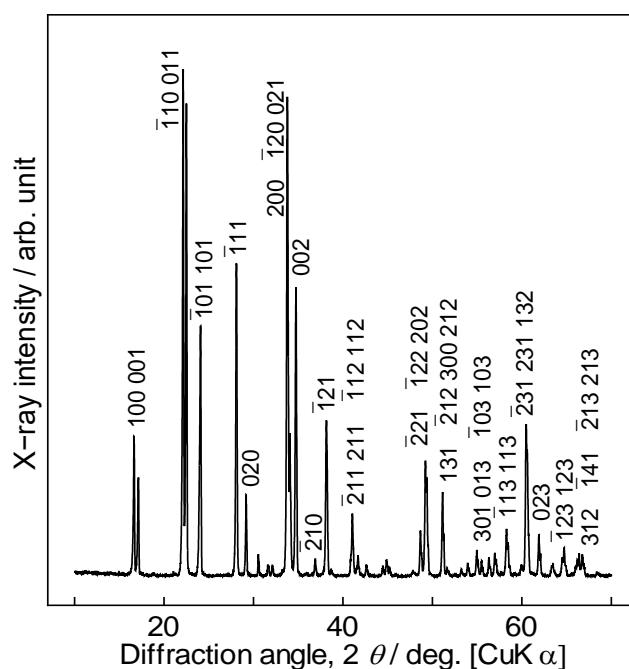

**Fig. S2** XRD pattern of the Li<sub>4</sub>SiO<sub>4</sub> compound employed in this study.

### Preparation of LiNaCO<sub>3</sub>

Nominal amounts of Li<sub>2</sub>CO<sub>3</sub> powder (99.9 %, Furuuchi Chemical Co.) and Na<sub>2</sub>CO<sub>3</sub> powder (99.9%, FUJIFILM WAKO Chem.) were mixed in ethanol using the Al<sub>2</sub>O<sub>3</sub> mortar and pestle. The powder was heated at 500 °C for 24 h in air.

Fig. S3 shows the XRD pattern of the obtained powder. All the peaks were successfully indexed to the C2/m (No. 12) space group with  $a = 14.285 \text{ \AA}$ ,  $b = 24.750 \text{ \AA}$ ,  $c = 3.302 \text{ \AA}$ , and  $\beta = 91.7^\circ$ , thereby confirming the preparation of single-phase LiNaCO<sub>3</sub> (JCPDS No. 34-1193).

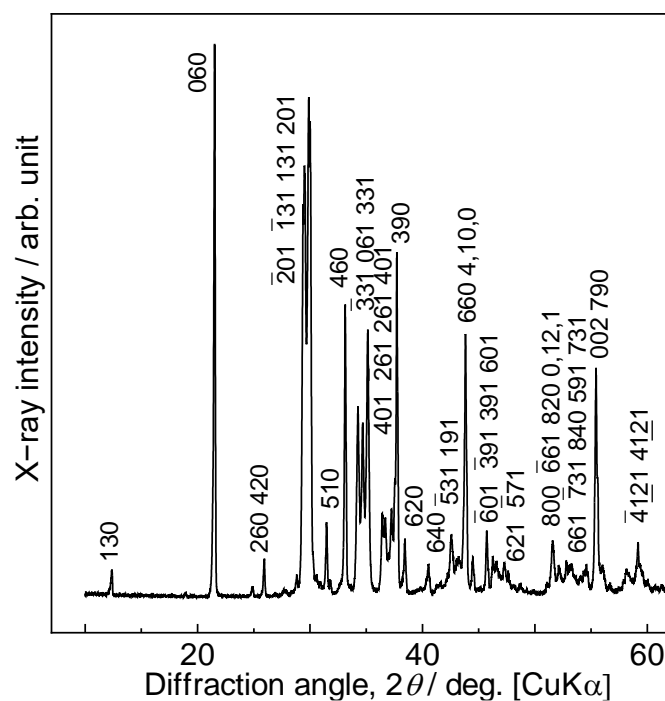

**Fig. S3** XRD pattern of the LiNaCO<sub>3</sub> compound used in this study.

### Morphology of powder specimens after CO<sub>2</sub> absorption

Fig. S4 shows the SEM images of the powder after CO<sub>2</sub> absorption. CO<sub>2</sub> absorption was performed at 700 °C and followed by quenching to 25 °C under CO<sub>2</sub> gas flow in a TG-DTA apparatus. The initial Li<sub>3</sub>NaSiO<sub>4</sub> powder was prepared from (a) Li<sub>4</sub>SiO<sub>4</sub>/Li<sub>2</sub>SiO<sub>3</sub>/SiO<sub>2</sub> and (b) Li<sub>2</sub>CO<sub>3</sub>/Na<sub>2</sub>CO<sub>3</sub>/SiO<sub>2</sub>. XRD measurements revealed that both specimens were a mixture of LiNaCO<sub>3</sub> and Li<sub>2</sub>SiO<sub>3</sub>.<sup>1</sup>

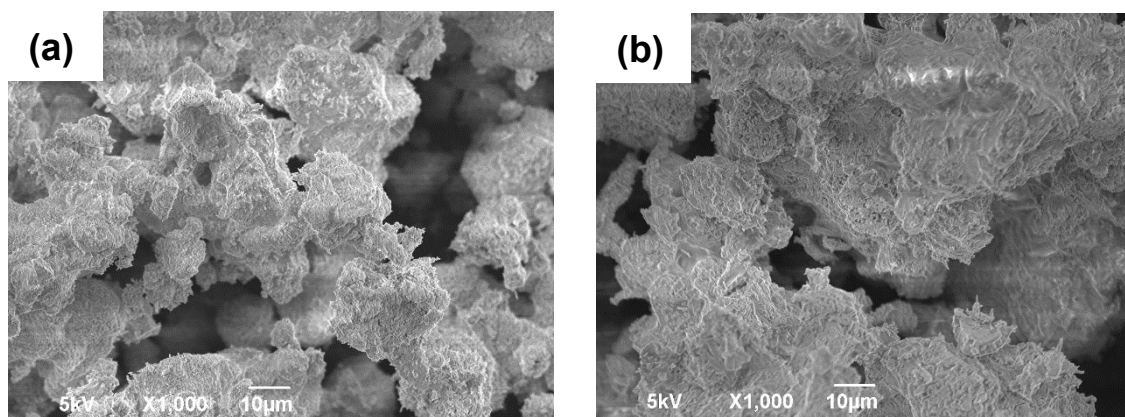

**Fig. S4** SEM images of the powder after CO<sub>2</sub> absorption at 700 °C. Initial Li<sub>3</sub>NaSiO<sub>4</sub> powder was prepared from (a) Li<sub>4</sub>SiO<sub>4</sub>/Li<sub>2</sub>SiO<sub>3</sub>/SiO<sub>2</sub> and (b) Li<sub>2</sub>CO<sub>3</sub>/Na<sub>2</sub>CO<sub>3</sub>/SiO<sub>2</sub>.

Less difference in morphology between the two powder specimens was observed compared to the initial  $\text{Li}_3\text{NaSiO}_4$  powders depicted in Fig. 8. At 700 °C in  $\text{CO}_2$  atmosphere,  $\text{Li}_3\text{NaSiO}_4$  decomposes to solid  $\text{Li}_2\text{SiO}_3$  powder and liquid  $\text{LiNaCO}_3$ . It was prospected that the size and shape of  $\text{Li}_2\text{SiO}_3$  particles generated by the decomposition was similar between the two kinds of powder, resulting in similar morphology of the powder mixture of  $\text{Li}_2\text{SiO}_3$  and  $\text{LiNaCO}_3$ , which solidified from the liquid phase during cooling at approximately 500 °C.

#### Reference

1. M. Hirai, E. Niwa and T. Hashimoto, *Dalton Trans.*, 2021, **50**, 5301–5310
